# Supplementary material for: The Extent of Community Pharmacists’ Involvement in Detecting and Resolving Drug Related Problems (DRPs) in Prescriptions - A Cross Sectional Study in a Community Pharmacy Setting From Sri Lanka
Source: Research Square preprint supplement (doi:10.21203/rs.3.rs-109512/v1), 2020-11-25
Supplement: Supplementary file 1 [file 177da1cb5912bf0c87ac6b4c.docx]

**Additional file 1: The main domains of PCNE classification used in the analysis**

| **No** | **Primary Domain** | **Causes for potential problem that used in our analysis** |
| --- | --- | --- |
| 1 | Drug selection | Inappropriate combination of drugs |
| Inappropriate duplication of therapeutic group or active ingredient |
| 2 | Drug form | Inappropriate drug form |
| 3 | Dose selection | Drug dose too high |
| Dosage regimen too frequent |
| Dose timing instructions wrong, unclear or missing |
| Strength of the drug missing: Low dose dispensed |
| Frequency of drug administration missing |
| 4 | Treatment duration | Duration of treatment too long |
| Duration of treatment missing |
| 5 | In complete essential information in prescriptions (in-house) | Necessary information not provided (includes age of the patient, date, and Sri Lanka Medical Council registration number of prescriber) |
| 6 | Other (in-house) | Outdated prescription |
| Unit of drug strength missing |
| Ambiguous name of medicine that cannot be read by both community pharmacistsand researcher |

**Additional file 2: Data collection sheet**

Date: …………………………………………..........................................................

Patient No: ………………………………………………………………………….

Age: …………………………………………………………………………………

Prescription from; State hospital Private hospital Others

| No | Name of the medicine | Dose | Frequency | Duration | Dosage form | When to take the medicine (time/before/ after meal) |
| --- | --- | --- | --- | --- | --- | --- |
|  |  |  |  |  |  |  |
|  |  |  |  |  |  |  |
|  |  |  |  |  |  |  |
|  |  |  |  |  |  |  |
|  |  |  |  |  |  |  |

Comments: **………………………………………………………………………………………………………………………………………………………………………………………………………………**

**Additional file 3: DRPs detected by community pharmacist and corrective actions taken**

Pharmacist No: …………………………………………………

Age (years): ……………………………………………………

Gender: Male Female

Working experience as pharmacist (Number of years): …………………………

| DRPs identified by the community pharmacist | What is the corrective action taken by the community pharmacist |
| --- | --- |
|  |  |
|  |  |
|  |  |
|  |  |
|  |  |
